# Supplementary material
Source: PubMed Central journal article supplement (PMC9949344)

Extended Data Fig. 1a

170 kDa —  
130 kDa —  
95 kDa —  
72 kDa —  
55 kDa —  
43 kDa —  
34 kDa —  
26 kDa —  
17 kDa —  
10 kDa —

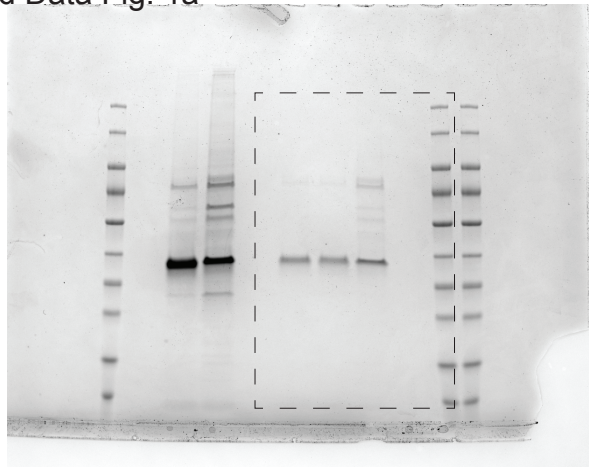

Extended Data Fig. 1b

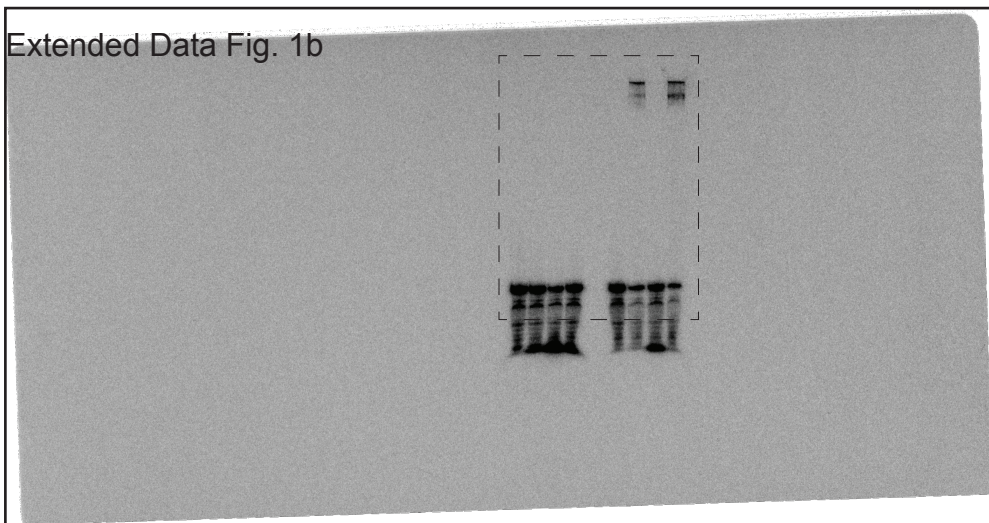

Extended Data Fig. 1d

170 kDa —  
130 kDa —  
95 kDa —  
72 kDa —  
55 kDa —  
43 kDa —  
34 kDa —  
26 kDa —

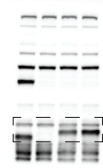

Extended Data Fig. 1e

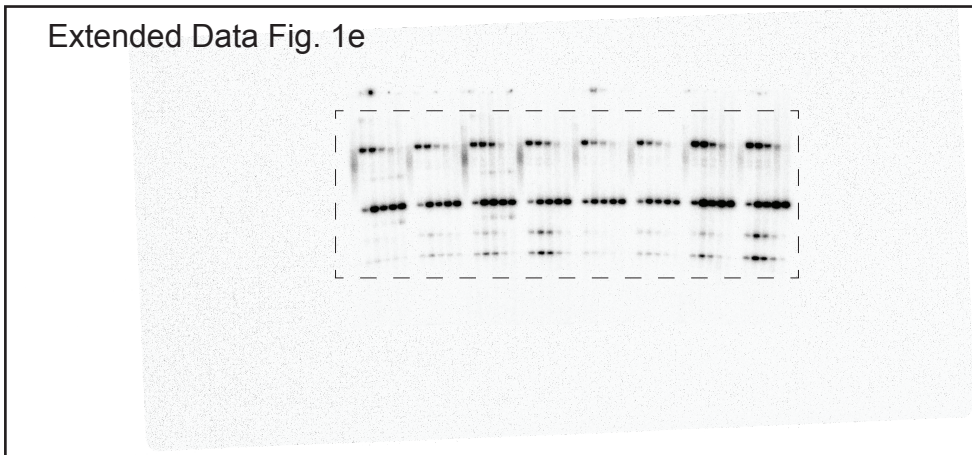

Supplement: NIHMS1799265-supplement-1799265_SD_ED_Fig_1.pdf [file NIHMS1799265-supplement-1799265_SD_ED_Fig_1.pdf]
