# Supplementary material
Source: PubMed Central journal article supplement (PMC9949344)

Extended Data Fig. 3a

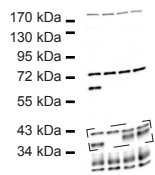

Extended Data Fig. 3b

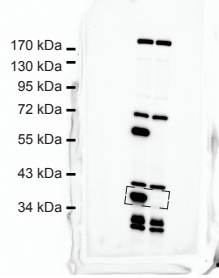

Extended Data Fig. 3c

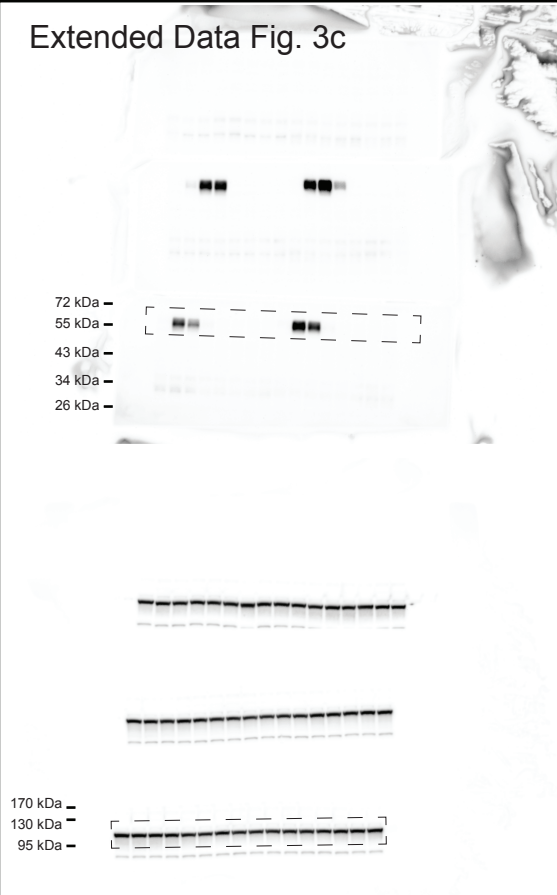

Extended Data Fig. 3e

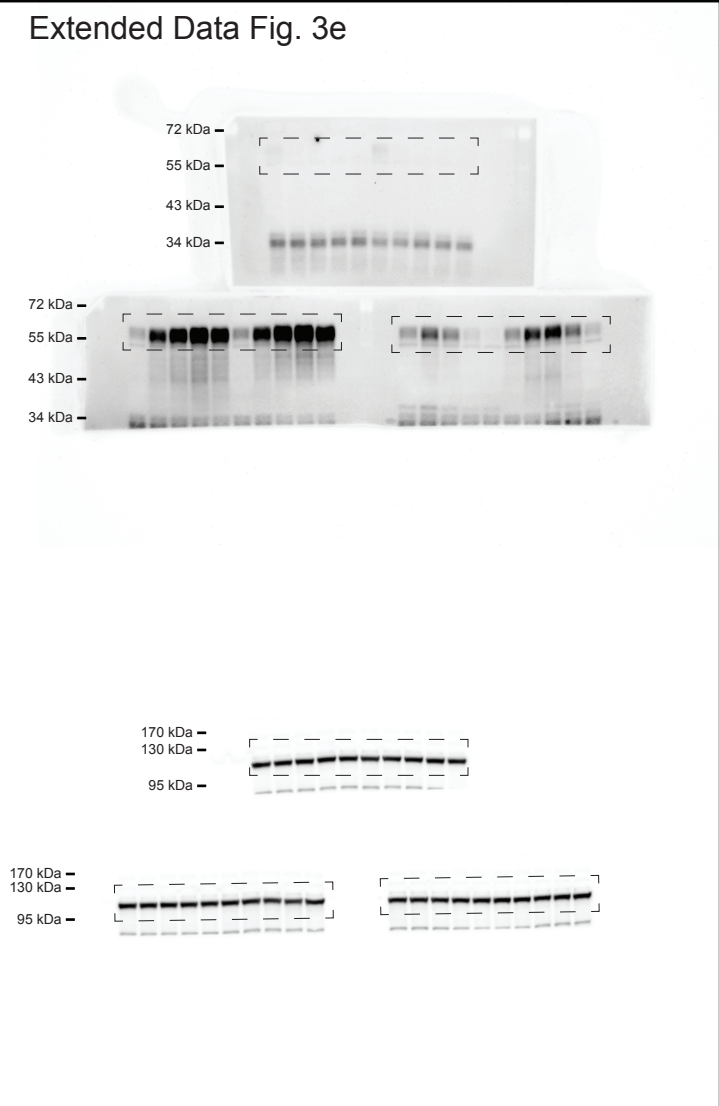

Extended Data Fig. 3d

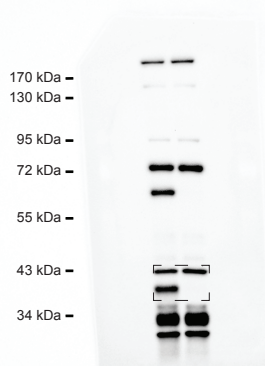

Supplement: NIHMS1799265-supplement-1799265_SD_ED_Fig_3.pdf [file NIHMS1799265-supplement-1799265_SD_ED_Fig_3.pdf]
