# Supplementary material
Source: PubMed Central journal article supplement (PMC9949344)

Extended Data Fig. 8a

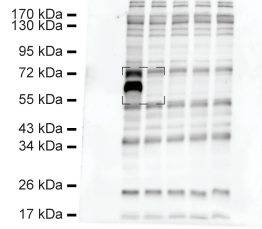

Extended Data Fig. 8b

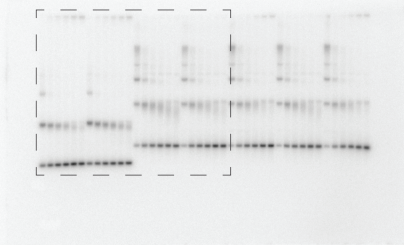

Extended Data Fig. 8c and 8e  
experiment 1

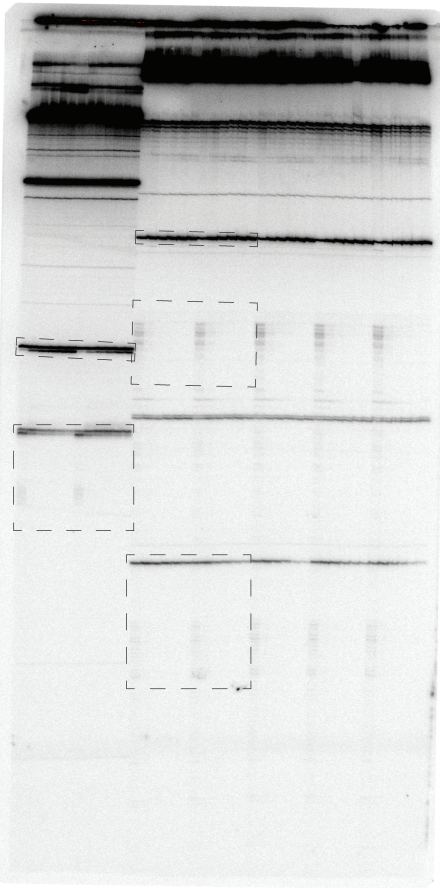

Extended Data Fig. 8c and 8e  
experiment 2

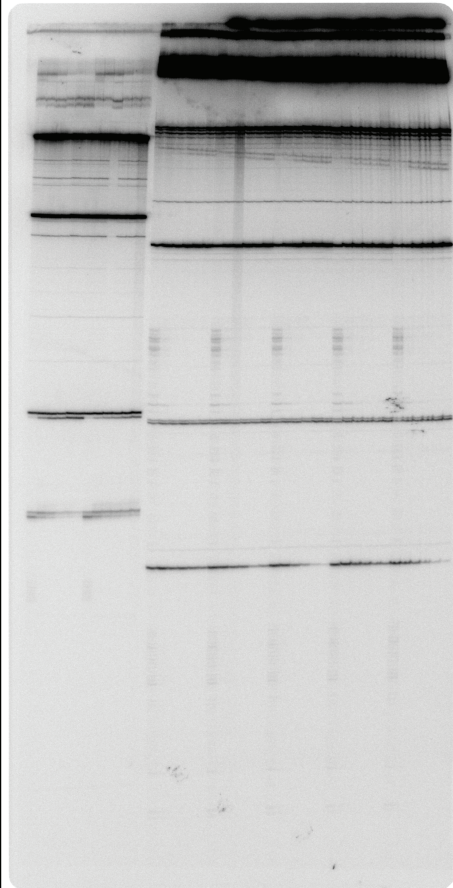

Supplement: NIHMS1799265-supplement-1799265_SD_ED_Fig_8.pdf [file NIHMS1799265-supplement-1799265_SD_ED_Fig_8.pdf]
