# Supplementary material
Source: PubMed Central journal article supplement (PMC9949344)
Supplement: NIHMS1799265-supplement-1799265_SD_Fig_3.pdf [file NIHMS1799265-supplement-1799265_SD_Fig_3.pdf]

Fig. 3b  
experiment 1

leftward fork |

rightward fork |

low  
contrast  
→

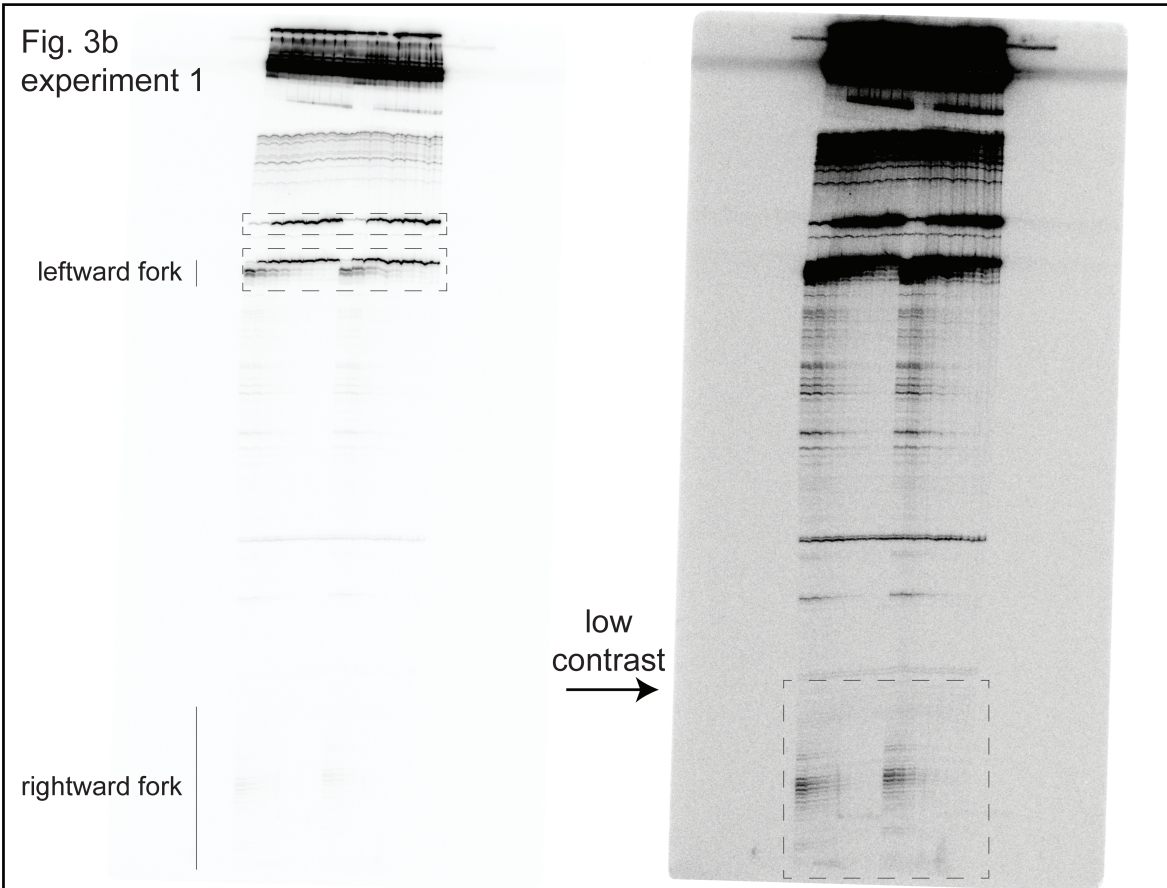

Fig. 3b  
experiment 2

leftward fork |

rightward fork |

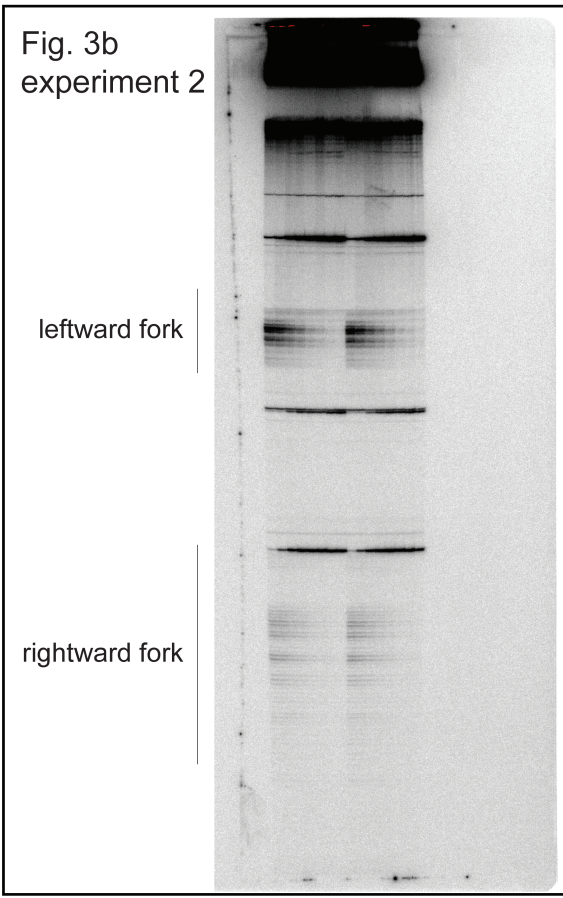

Note that experiments 1 and 2 were performed using plasmids with opposite orientations of the AP-ICL (AP site on top strand or AP site on bottom strand). The leftward fork encounters the AP site in the leading strand template in experiment 1. The rightward fork encounters the AP site in the leading strand template in experiment 2. This difference between experiments does not impact the quantification of -20 to -40 stalling reported in Fig. 3c.
