# Supplementary material
Source: PubMed Central journal article supplement (PMC9949344)

Extended Data Fig. 4a

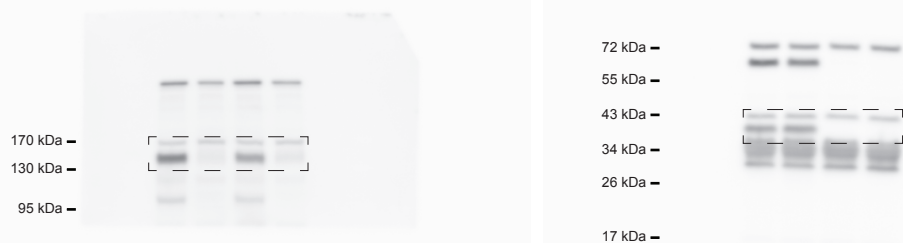

Extended Data Fig. 4b

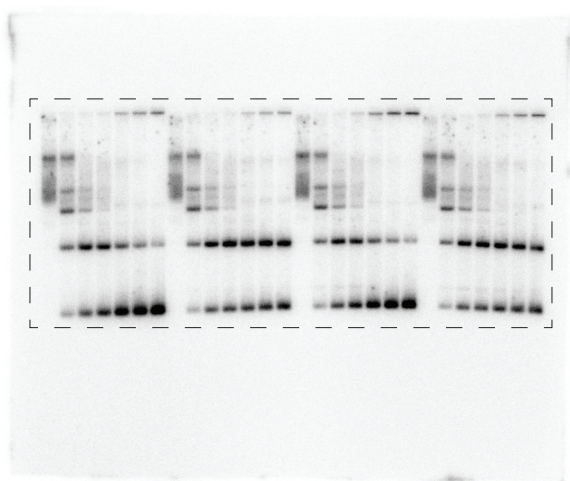

Supplement: NIHMS1799265-supplement-1799265_SD_ED_Fig_4.pdf [file NIHMS1799265-supplement-1799265_SD_ED_Fig_4.pdf]

Extended Data Fig. 5a

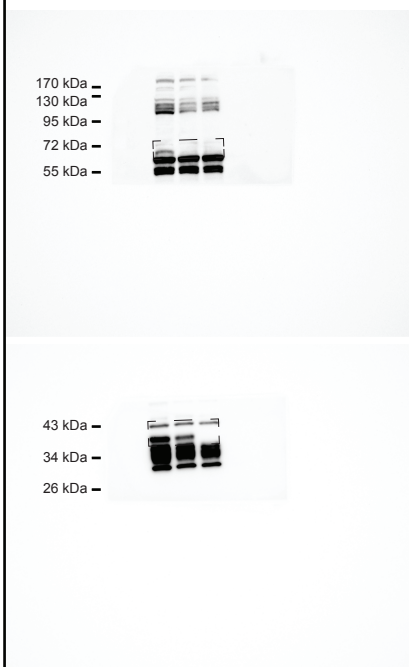

Extended Data Fig. 5c

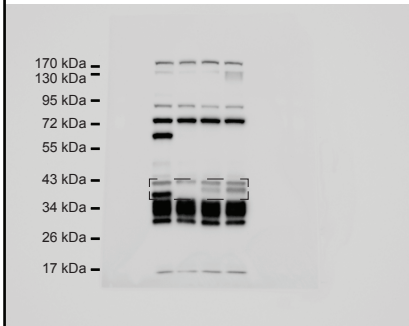

Extended Data Fig. 5b

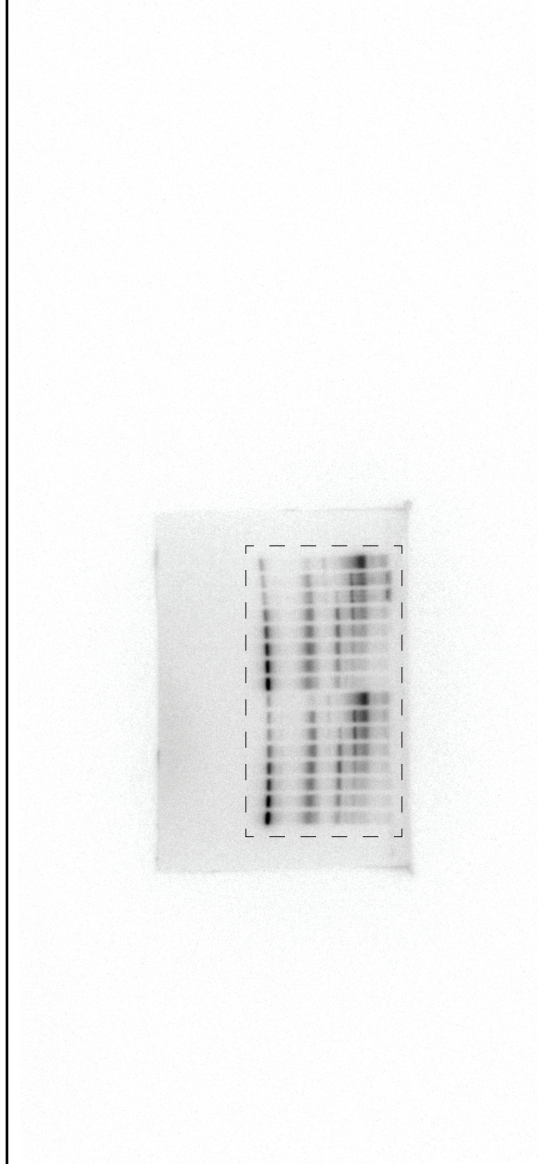

Supplement: NIHMS1799265-supplement-1799265_SD_ED_Fig_5.pdf [file NIHMS1799265-supplement-1799265_SD_ED_Fig_5.pdf]

Extended Data Fig. 6c

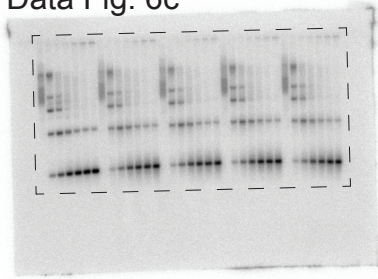

Extended Data Fig. 6d

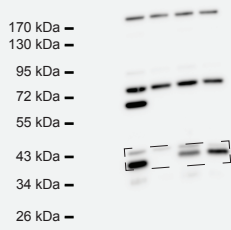

Extended Data Fig. 6e

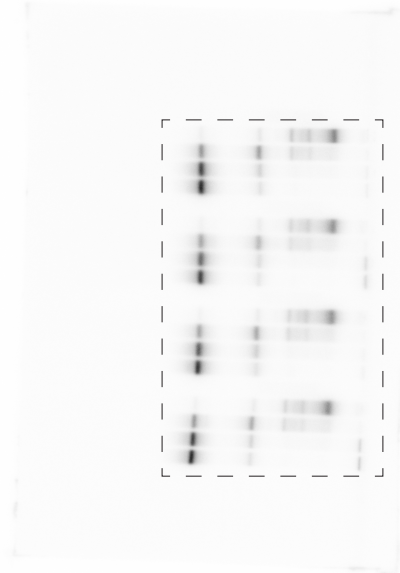

Extended Data Fig. 6f

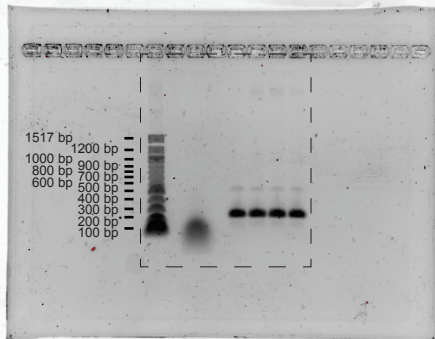

Supplement: NIHMS1799265-supplement-1799265_SD_ED_Fig_6.pdf [file NIHMS1799265-supplement-1799265_SD_ED_Fig_6.pdf]

Extended Data Fig. 7a

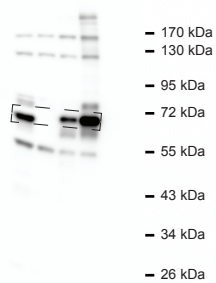

Extended Data Fig. 7b

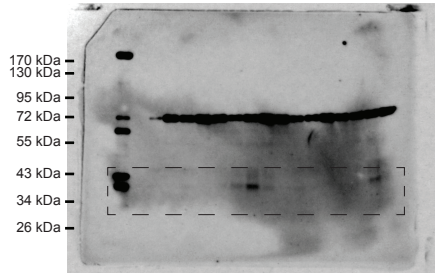

Extended Data Fig. 7c

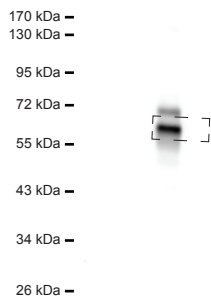

Extended Data Fig. 7d

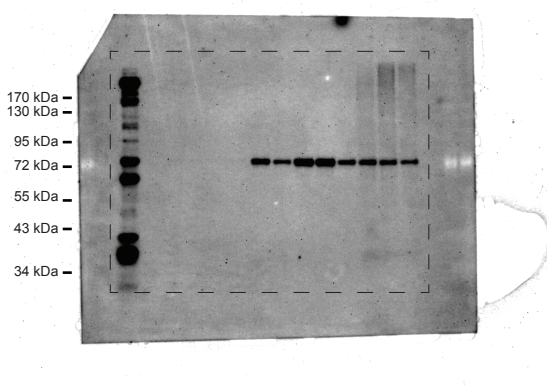

Supplement: NIHMS1799265-supplement-1799265_SD_ED_Fig_7.pdf [file NIHMS1799265-supplement-1799265_SD_ED_Fig_7.pdf]

Fig. 1c

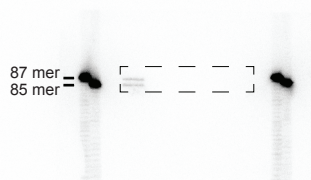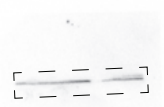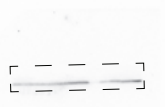

Fig. 1e

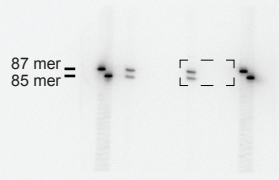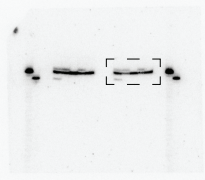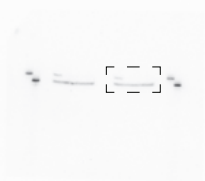

Fig. 1d

170 kDa -  
130 kDa -  
95 kDa -  
72 kDa -  
55 kDa -  
43 kDa -  
34 kDa -  
26 kDa -

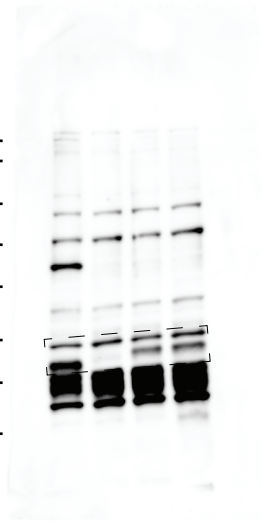

Supplement: NIHMS1799265-supplement-1799265_SD_Fig_1.pdf [file NIHMS1799265-supplement-1799265_SD_Fig_1.pdf]

Fig. 2a

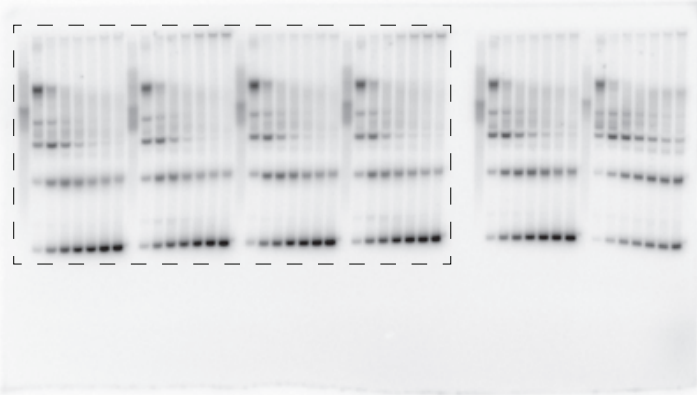

Fig. 2c

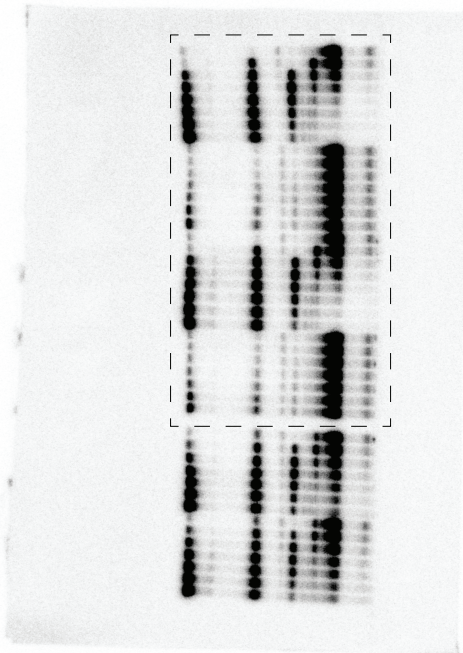

Fig. 2d

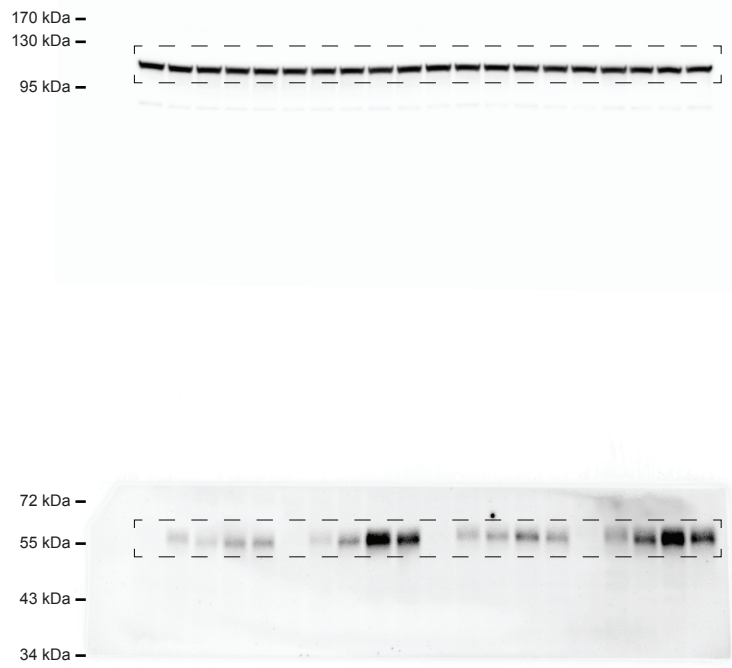

Supplement: NIHMS1799265-supplement-1799265_SD_Fig_2.pdf [file NIHMS1799265-supplement-1799265_SD_Fig_2.pdf]

Fig. 4a

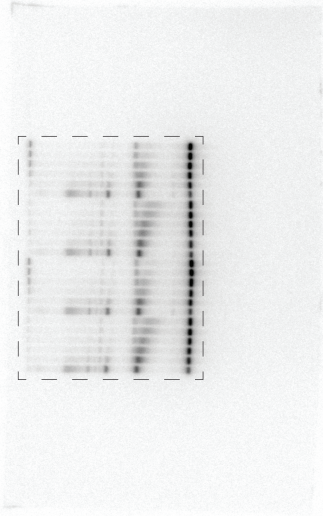

Fig. 4b  
experiment 1

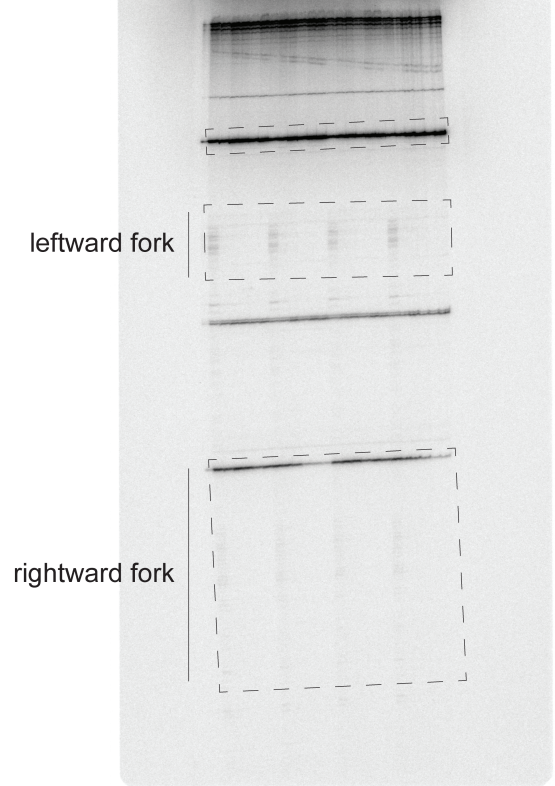

Fig. 4b  
experiment 2

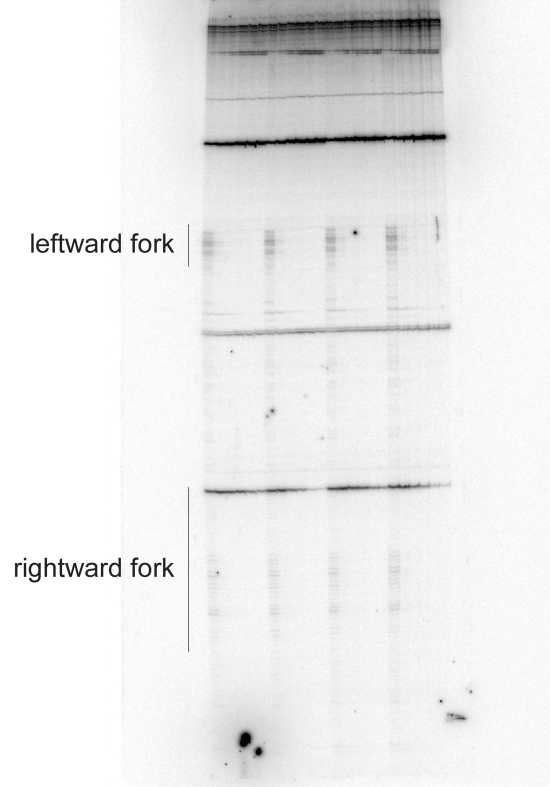

Fig. 4b  
experiment 3

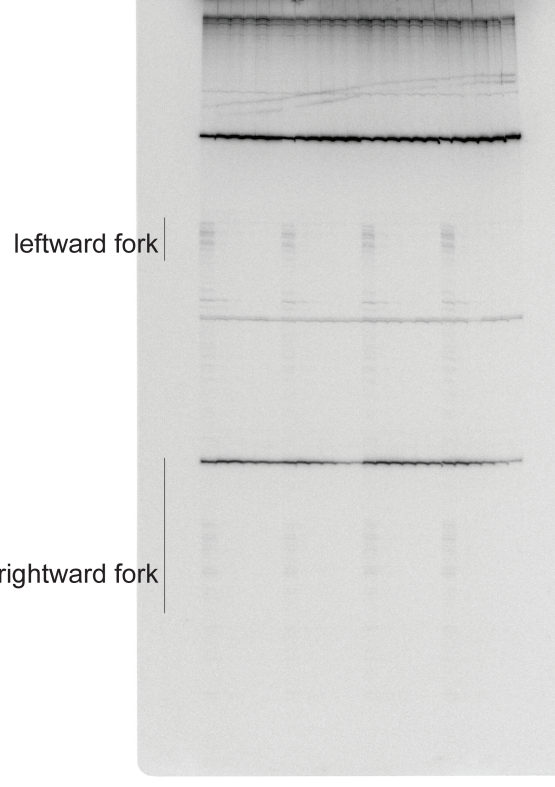

Supplement: NIHMS1799265-supplement-1799265_SD_Fig_4.pdf [file NIHMS1799265-supplement-1799265_SD_Fig_4.pdf]

Fig. 6b

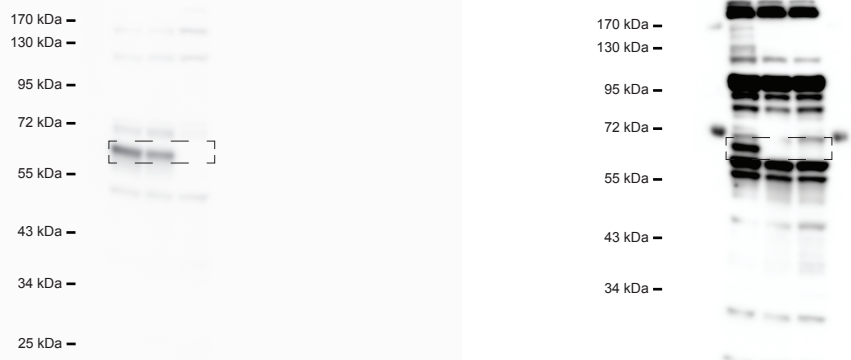

Fig. 6c

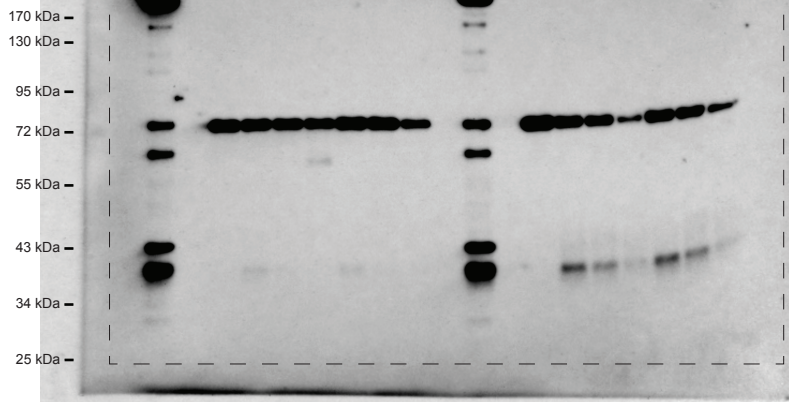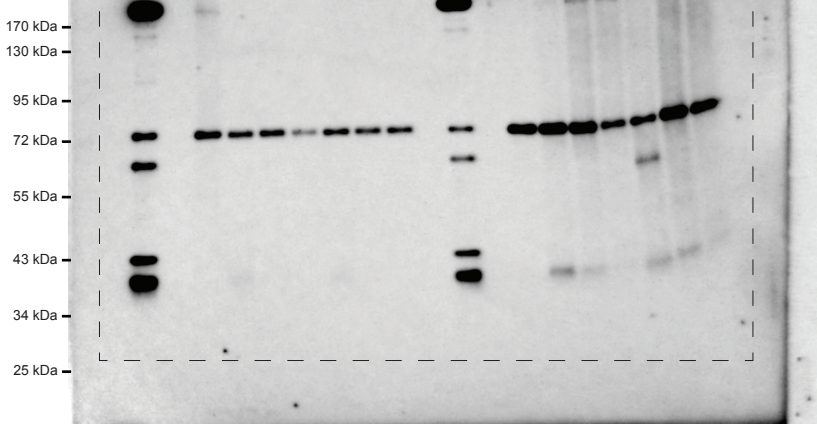

Fig. 6d

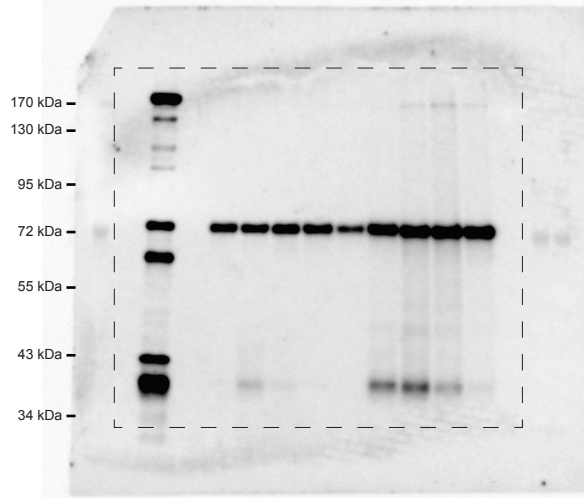

Supplement: NIHMS1799265-supplement-1799265_SD_Fig_6.pdf [file NIHMS1799265-supplement-1799265_SD_Fig_6.pdf]
